# Supplementary material for: Heterogeneous interaction network of yeast prions and remodeling factors detected in live cells
Source: PubMed Central journal article supplement — BMB Rep. 2017 Sep 30;50(9):478–83. doi: 10.5483/BMBRep.2017.50.9.084 (PMC5625696; doi:10.5483/bmbrep.2017.50.9.084), 2017-09-30
Supplement: bmb-50-478_suppl.pdf [file bmb-50-478_suppl.pdf]

## Supplementary Materials

**Manuscript Type:** Article

**Title:** Heterogeneous interaction network of yeast prions and remodeling factors detected in live cells

**Author's Name:** Chan-Gi Pack<sup>1,\*</sup>, Yuji Inoue<sup>2,#</sup>, Takashi Higurashi<sup>3</sup>, Shigeko Kawai-Noma<sup>2</sup>, Daigo Hayashi<sup>2</sup>, Elizabeth Craig<sup>3</sup>, Hideki Taguchi<sup>2</sup>

**Affiliation:** <sup>1</sup> Asan Institute for Life Sciences, Asan Medical Center, University of Ulsan College of Medicine, Seoul 05505, Republic of Korea. <sup>2</sup> Department of Biomolecular Engineering, Graduate School of Biosciences and Biotechnology, Tokyo Institute of Technology, B56, 4259 Nagatsuta, Midori-ku, Yokohama 226-8501, Japan. <sup>3</sup> Department of Biochemistry, University of Wisconsin, 433 Babcock Drive Madison, WI 53706, USA. # Present address: Department of Virology, Research Center for Infectious Diseases Control, Research Institute of Microbial Diseases, Osaka University, 3-1 Yamadaoka, Suita, Osaka, 565-0871, Japan

\* Corresponding author

**Running Title:** Interaction network of yeast prions in live cells

**Keywords:** yeast prions, remodeling factors, fluorescence cross-correlation spectroscopy, live cell, protein interaction

## Supplementary Materials and Methods

### Plasmid Construction

Open reading frame (ORF) sequences of *SUP35*, *RNQ1*, *URE2*, and *NEW1* genes were cloned directly from purified genomic DNA of *S. cerevisiae* BY4741 strain by a standard PCR method with appropriate pair of oligonucleotides. Each partial sequence corresponding to residues 1-253, 1-65 and 1-130 of Sup35, Ure2 and New1, respectively, was fused to the 5'-end of the sequence of *TagRFP* derived from pTagRFP-N (Evrogen) by an overlap-extension PCR method. Likewise, sequence corresponding to residues 134-405 of Rnq1 was fused to the 3'-end of the *TagRFP*-coding sequence. Finally, each chimeric DNA fragment was subcloned onto the pYES2 yeast expression plasmid vector (Invitrogen) to produce pYES-*SUP35NM-TagRFP*, pYES-*URE2N-TagRFP*, pYES-*NEWIN-TagRFP* and pYES-*TagRFP-RNQ1C*. As a negative control, a plasmid expressing thioredoxin-fused TagRFP (pYES-*Trx-TagRFP*) was also constructed by fusing the thioredoxin ORF originally coded on pThio-His B plasmid (Invitrogen) to the 5'-end of the TagRFP-coding sequence and subcloning onto pYES2 vector.

A plasmid that expresses Hsp104 fused with mCherry (pGAL1-*HSP104-mCherry*) was constructed as follows. The *HSP104* containing *SacI*-*BamHI* DNA fragment was cloned into YCplac111GAL1p (1). The *mCherry* DNA fragment was amplified from a pmCherry-N1 vector (Clontech) and inserted into the *BamHI*-*SalI* site of the YCplac111GAL1pHSP104 plasmid. This includes GS linker between *HSP104* and mCherry.

To visualize Sis1 in the yeast cell, pRS314-*SIS1p-SIS1-mCherry* was prepared. *SIS1* gene including *SIS1* own promoter was cloned from W303 PJ513a (2) and fused *mCherry* gene under *SIS1* gene with Gly-Ser linker by PCR. *SIS1p-SIS1-mCherry* construct was cloned to pRS314 (3) and used for plasmid shuffling to obtain Sis1-mCherry expression strains.

[*RNQ1p-RNQ1-GFP*] plasmid, pRS413-RNQ1p-RNQ1-GFP, was from our previous work (2).

A plasmid (pRS413CYC1p-SUP35NM-GFP) encoding Sup35NM-GFP under the control of CYC1 promoter was constructed with *SUP35NM* gene cloned from W303 PJ513a and monomeric GFP gene (2).

### **Yeast Strain**

In this study, *S. cerevisiae* G74-D694 strain, which we have established previously (4), was used as the parent strain. G74-D694 is a derivative of 74-D694 [*MATa*, *ade1-14(UGA)*, *his3*, *leu2*, *trp1*, *ura3*] and carries a modified *SUP35* gene (*SUP35NGMC*), in which a GFP gene was integrated between the N and M domains of the endogenous *SUP35* gene. Either [*psi*<sup>-</sup>] or [*PSI*<sup>+</sup>] G74-D694, [*gpsi*<sup>-</sup>] or [*GPSI*<sup>+</sup>], respectively, was transformed with yeast expression plasmid described above by a standard lithium acetate method. Transformants were selected by synthetic medium lacking uracil (SC-Ura) or leucine (SC-Leu). To induce expression of each protein, 2% (w/v) galactose was added to synthetic medium containing 2% (w/v) raffinose instead of glucose and lacking uracil (SRaf (-ura)) for 4~ to 24h.

Details of W303 *sis1-Δ::LEU2* [*SIS1p-SIS1*] [*RNQ*<sup>+</sup>] [*psi*<sup>-</sup>] or [*rnq*<sup>-</sup>] [*PSI*<sup>+</sup>] strains were described previously (2, 5). BY4741 *MATa HSP104-GFP::HIS3MX6* was described in the previous study (6). W303 *sis1-Δ::LEU2* [*SIS1p-SIS1-mCherry*] strains with [*RNQ*<sup>+</sup>] or [*PSI*<sup>+</sup>] were prepared by plasmid shuffling. Growth and prion maintenance of W303 *sis1-Δ::LEU2* strain having expression of Sis1-mCherry was indistinguishable to W303 *sis1-Δ::LEU2* strain with that of wild-type Sis1 from a [*SIS1p-SIS1*] plasmid. To measure FCS/FCCS, prion-GFP plasmid, *pRS413-RNQ1p-RNQ1-GFP* for [*RNQ*<sup>+</sup>]/[*rnq*<sup>-</sup>] or *pRS413CYCp-SUP35NM-GFP* for [*PSI*<sup>+</sup>]/[*psi*<sup>-</sup>], was coexpressed in W303 *sis1-Δ::LEU2* [*SIS1p-SIS1-mCherry*]. Semi-denaturing detergent agarose gel (5, 7) pattern of the prion-GFP coexpression strains showed identical pattern as of strains without coexpression. W303 [*rnq*<sup>-</sup>] and [*psi*<sup>-</sup>] strains were

obtained by 3 mM guanidine HCl hydrochloride (GdnHCl) treatment in the appropriate media for 2 days.

### **Protein Expression**

Transformed yeast cells were cultured in SRaf (-ura). At mid-log phase, protein expression was induced by the addition of galactose at a final concentration of 0.2%. After a 12-h incubation at 30°C, cells were used for FCCS measurement. To estimate the expression level of each fusion protein conveniently, we utilized the fluorescence of TagRFP. Fluorescence images at green and red channel of a 100- $\mu$ l droplet of each culture fluid were taken by LAS-4000 luminescence imager (Fuji Film, Japan) and the relative TagRFP fluorescence was analyzed by Multi Gauge (Fuji Film, Japan).

### **Fluorescence Correlation Spectroscopy (FCS) and Fluorescence Cross-Correlation**

**Spectroscopy (FCCS).** FCS and FCCS measurements were performed at 25°C on a confocal microscope system (LSM 510; Carl Zeiss) combined with a ConfoCor2 (Carl Zeiss). For confocal imaging followed by FCS or FCCS measurement, GFP and RFP were scanned independently in a multi-tracking mode. Details of the combined microscope system, analysis of fluorescence auto- function (FAF) obtained from FCS measurement, and analysis of two FAFs and one cross-correlation function (FCF) from FCCS measurement were described in previous studies (1, 6). Briefly, FAF and FCF, from which the absolute number and diffusion coefficient ( $D$ ) of mobile fluorescent molecules, fractional ratio, and interaction amplitude represented by relative cross-correlation amplitude (RCA) are calculated, are obtained as follows:

The fluorescence auto-correlation functions of the red and green channels,  $G_r(\tau)$  and  $G_g(\tau)$ , and the fluorescence cross-correlation function,  $G_c(\tau)$ , were calculated from

$$G_x(\tau) = 1 + \frac{\langle \delta I_i(t) \cdot \delta I_j(t+\tau) \rangle}{\langle I_i(t) \rangle \langle I_j(t) \rangle} \quad (1)$$

where  $\tau$  denotes the time delay,  $I_i$  is the fluorescence intensity of the red channel ( $i = r$ ) or green channel ( $i = g$ ), and  $G_r(\tau)$ ,  $G_g(\tau)$ , and  $G_c(\tau)$  denote the auto correlation function of red ( $i = j = x = r$ ), green ( $i = j = x = g$ ), and cross ( $i = r, j = g, x = c$ ), respectively. The acquired  $G_x(\tau)$ s were fitted using a one-component model for solution samples and a two-component model for live cells:

$$G_x(\tau) = 1 + \frac{1}{N} \sum_i F_i \left( 1 + \frac{\tau}{\tau_i} \right)^{-1} \left( 1 + \frac{\tau}{s^2 \tau_i} \right)^{-1/2} \quad (2)$$

where  $F_i$  and  $\tau_i$  are the fraction and diffusion time of component  $i$ , respectively.  $N$  is the average number of fluorescent particles in the excitation-detection volume defined by radius  $w_0$  and length  $2z_0$ , and  $s$  is the structure parameter representing the ratio  $s = z_0/w_0$ . The structure parameter was calibrated using the known diffusion coefficient of Rhodamine-6G at room temperature ( $280 \mu\text{m}^2\text{s}^{-1}$ ). To estimate the diffusion coefficient and fractional ratio from FCS or FCCS measurements, FAF and FCFs in live cells were fitted by a two-component model ( $i=2, D_{\text{fast}}$  and  $D_{\text{slow}}$ ) with a triplet term (6). Although the shape of FAFs originated from a one-component model (i.e. single-species) only depends on the diffusional mobility, it is emphasized that the shape of FAFs originated from a multi-component model (multi-species) depends not only on the diffusional mobility but also on fractional ratio of mobile species (1). For FCCS measurement, simultaneous excitation of GFP- and RFP-tagged proteins was carefully carried out at minimal and optimal excitation powers, chosen to obtain sufficiently high signal-to-noise ratios for the analysis of the diffusional coefficient and molecular interaction. Data containing severe photobleaching possibly resulting from a high proportion of immobilized fluorophores and non-stationary fluorescent signals resulting from

the drift of yeast cells were excluded from the analysis. For FCCS analysis, the amplitude of the cross-correlation function was normalized by the amplitude of the autocorrelation function of RFP to calculate the relative cross-correlation amplitude  $((G_c(0)-1)/(G_r(0)-1))$ ; RCA value)(6).

**Supplementary Table S1. Theoretical molecular weights of prion proteins, Sis1, and Hsp104.**

| Proteins | Theoretical Mw (kD) | FP tagged proteins    | Total theoretical Mw (kD) | Mw <sub>fcs</sub> <sup>c</sup> |
|----------|---------------------|-----------------------|---------------------------|--------------------------------|
|          |                     | mGFP ,mCherry, TagRFP | 28                        | 25                             |
| Sup35NM  | 49                  | Sup35NM-GFP           | 77                        | 79                             |
| Sup35    | 79                  | NGMC                  | 107                       | 350                            |
| Rnq1     | 43                  | Rnq-GFP               | 71                        | 76                             |
| Ure2     | 40                  | Ure2-mCherry          | 68                        | -                              |
| New1     | 134                 | New1-Ure2-mCherry     | 162                       | -                              |
| Sis1     | 40                  | Sis1-mCherry          | 68 (136 <sup>a</sup> )    | 1720                           |
| Hsp104   | 104                 | Hsp104-GFP            | 132 (792 <sup>b</sup> )   | 8600                           |

<sup>a</sup> Molecular weight of Sis1-GFP as a homo-dimer.

<sup>b</sup> Molecular weight of Hsp104-GFP as a hexamer complex.

<sup>c</sup> Mw calculated from FCS analysis using lysis solution samples.

**Supplementary Table S2. Molecular concentrations of Sup35NM-GFP and Sup35NGMC proteins in yeast cells**

| <b>Proteins and cell type</b>              | <b>Concentration<br/>(nM)</b> | <b>SD<br/>(nM)</b> |
|--------------------------------------------|-------------------------------|--------------------|
| Sup35NM-GFP in [ <i>psi</i> ]              | 676                           | 130                |
| Sup35NGMC in [ <i>gpsi</i> ]               | 285                           | 60                 |
| Sup35NM-GFP in [ <i>PSI</i> <sup>+</sup> ] | 193                           | 20                 |
| Sup35 NGMC in [ <i>GPSI</i> <sup>+</sup> ] | 150                           | 12                 |



Supplementary Figure S1

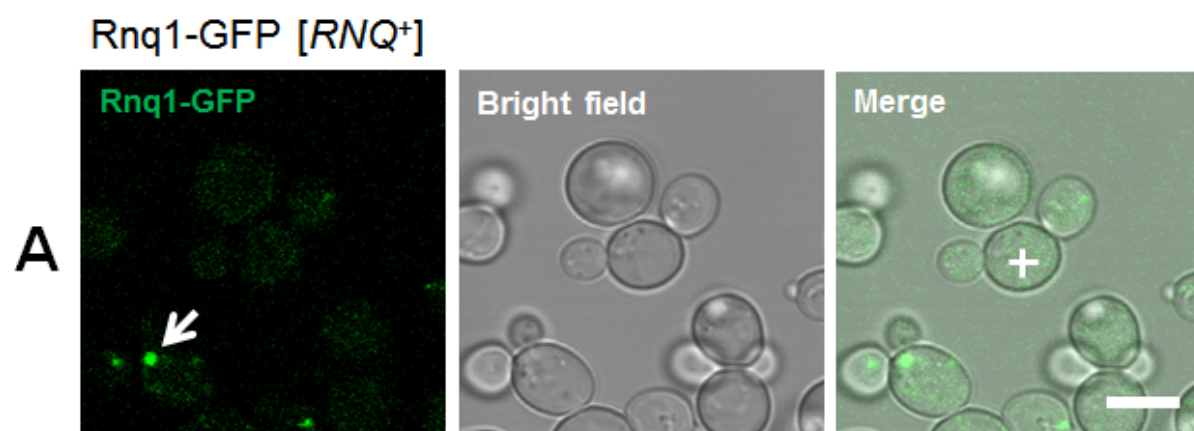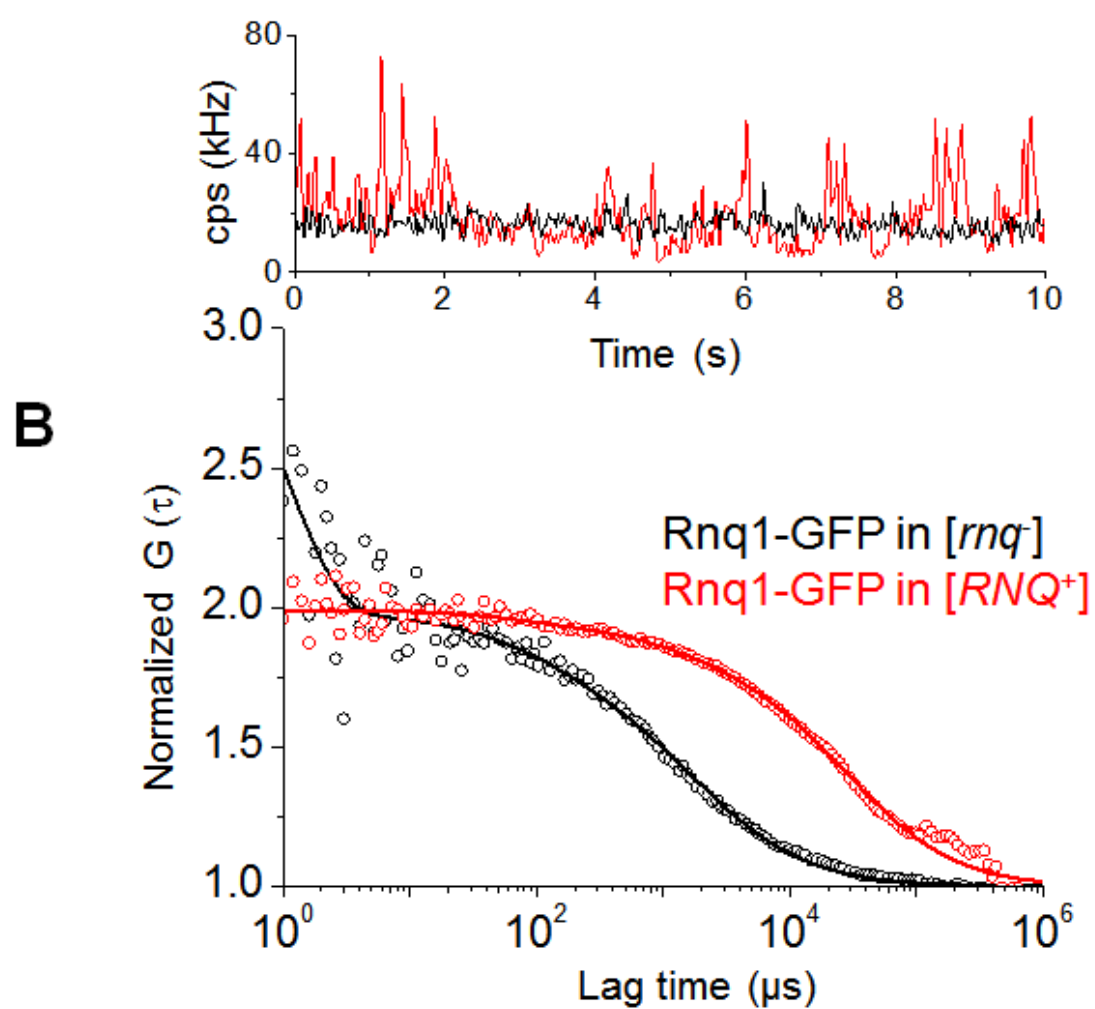

Supplementary Figure S2

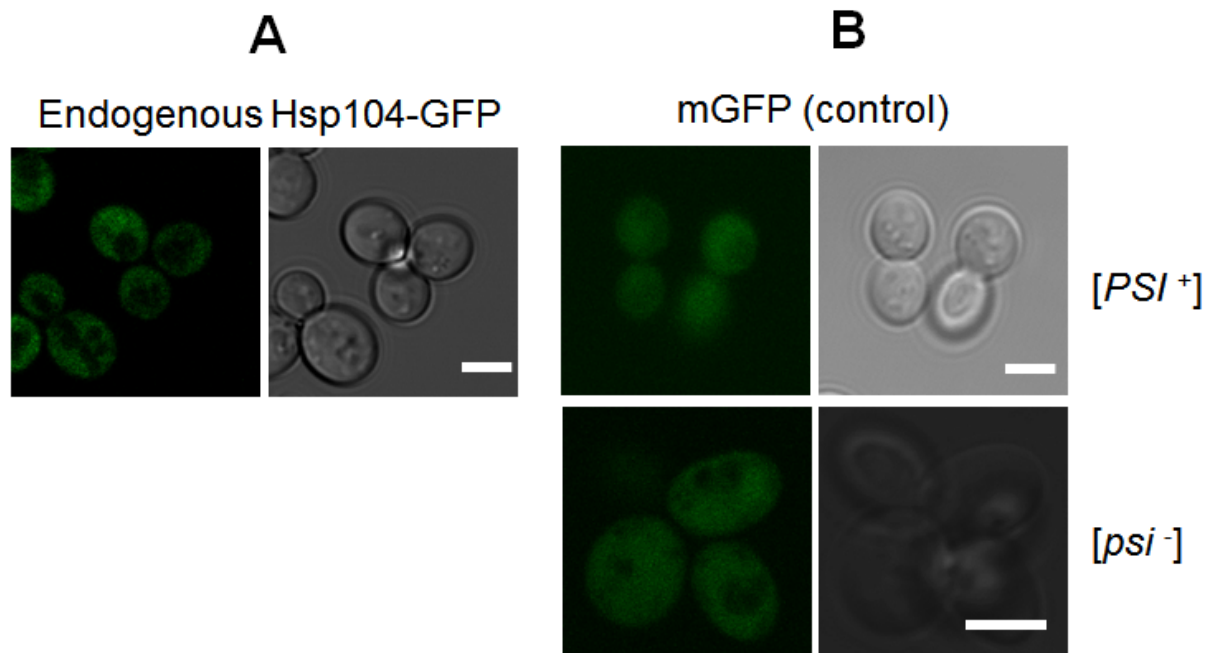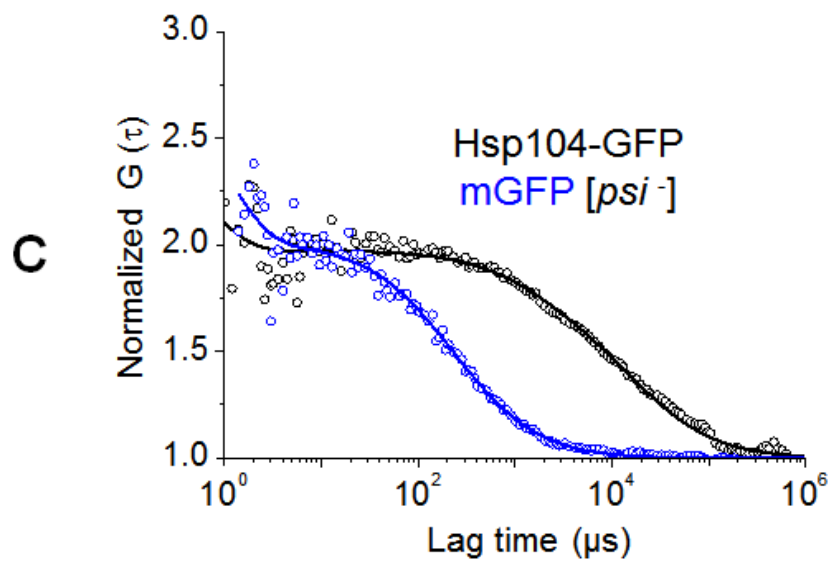

Supplementary Figure S3

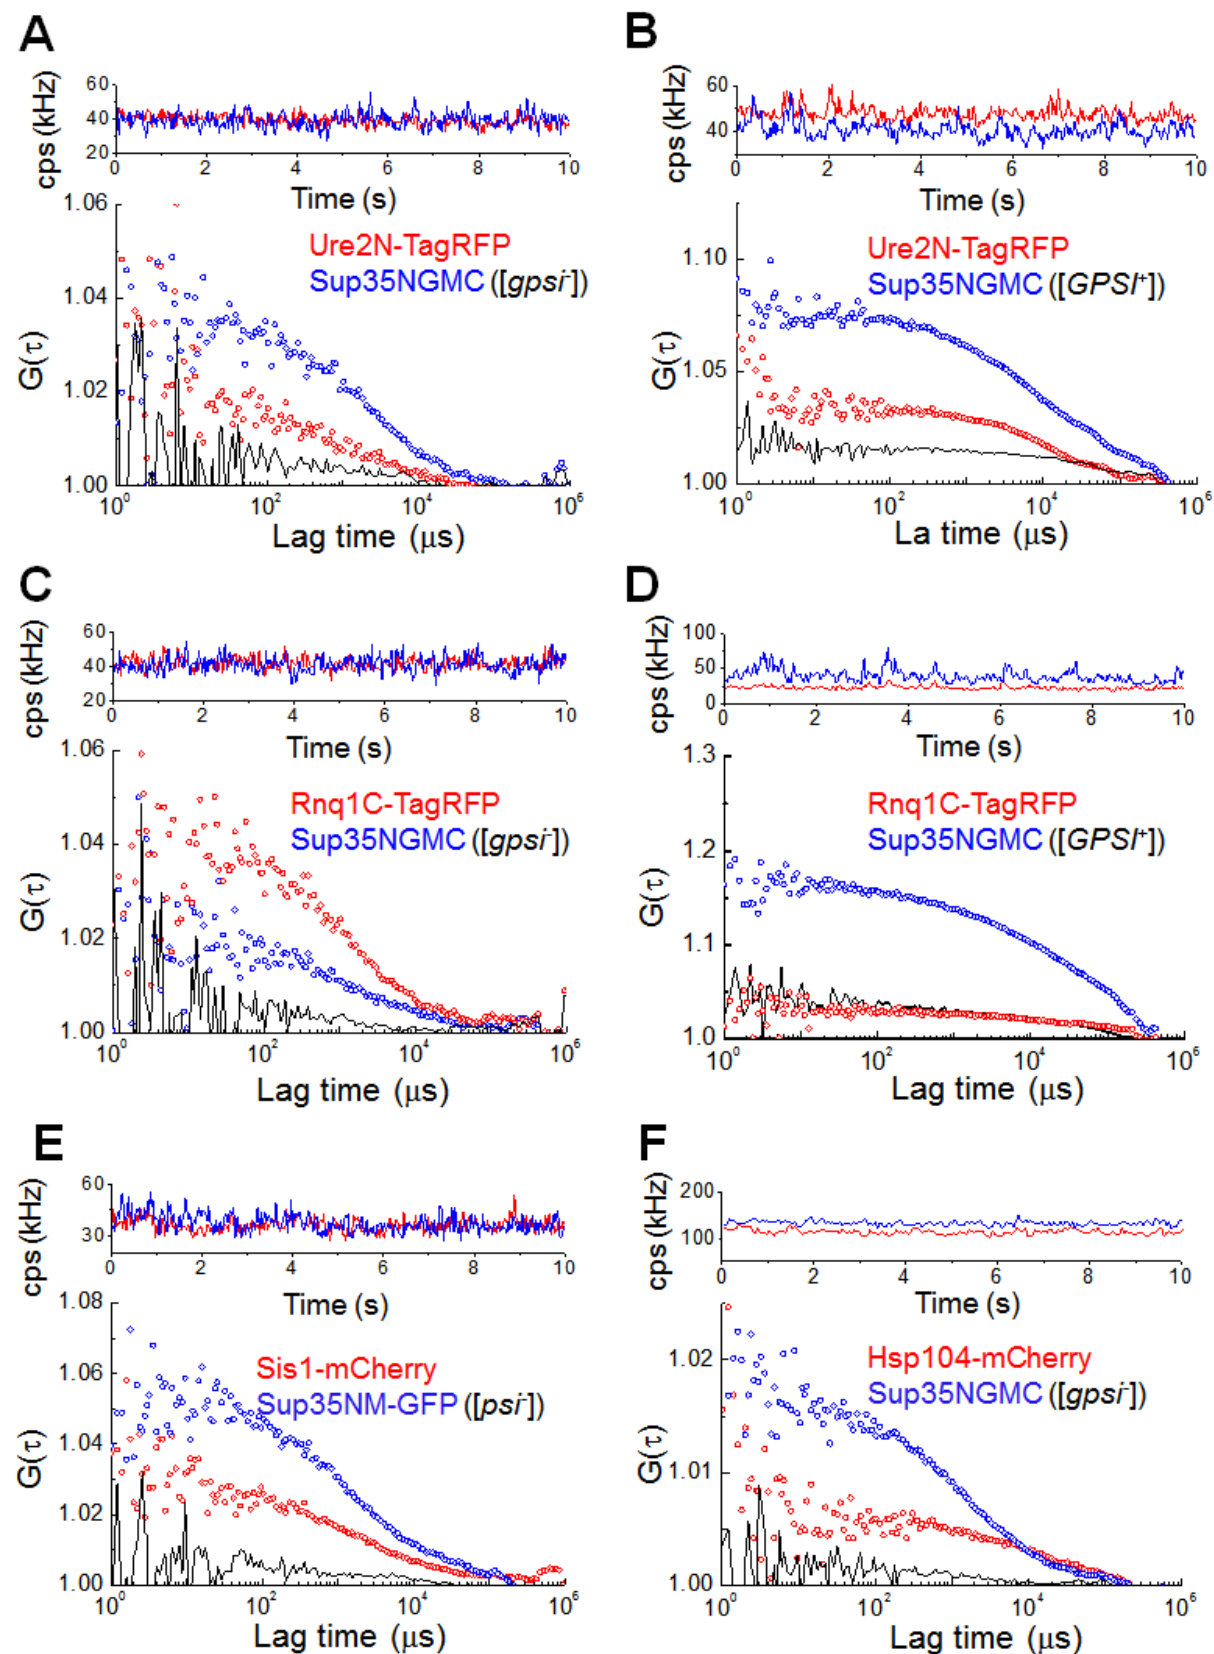

Supplementary Figure S4

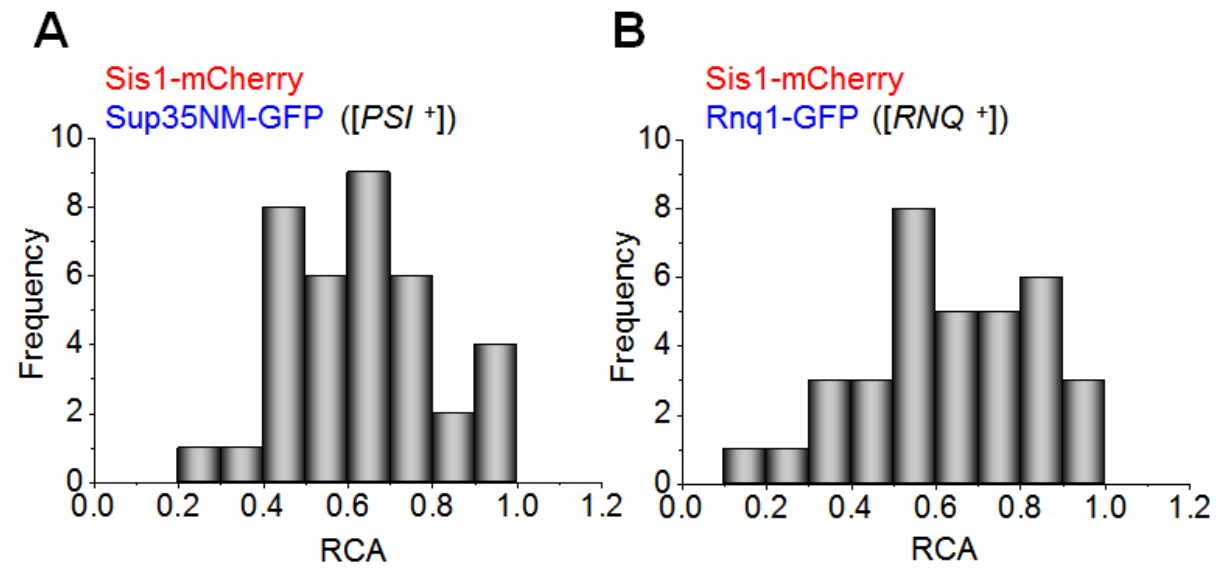

### Supplementary Figure Legends

#### Supplementary Figure S1. Diffusional properties of Rnq1-GFP in live cells. (A)

Fluorescence-confocal image of [*RNQ*<sup>+</sup>] prion cells expressing Rnq1-GFP are shown. Scale bar, 5 $\mu$ m. Arrow and cross hair indicate a large immobile focus in a mother cell and the position of FCS measurement shown in (B), respectively. (B) Representative two FCS measurements carried on [*rnq*<sup>-</sup>] and [*RNQ*<sup>+</sup>] cells are respectively shown. (Upper) Time trace of average fluorescence intensity (counts per second; cps in kHz) of Rnq1-GFP observed in [*rnq*<sup>-</sup>] (*black*) and [*RNQ*<sup>+</sup>] (*red*) cells. (Bottom) The corresponding fluorescence auto-correlation functions (FAFs) calculated from the time trace are also shown. Fit curves (solid line) were obtained from two-component analysis. For comparison of mobility, the curves were normalized to the same amplitude,  $G(0) = 2$ .

#### Supplementary Figure S2. Slow diffusional behavior of Hsp104-GFP in non-prion cells.

(A) Fluorescence-confocal image of yeast cells endogenously expressing Hsp104-GFP are shown. Scale bar, 5 $\mu$ m. (B) Fluorescence-confocal image of [*psi*<sup>-</sup>] and [*PSI*<sup>+</sup>] cells expressing monomer GFP (mGFP) are respectively shown. Scale bar, 5 $\mu$ m. (C) Representative normalized FAFs of Hsp104-GFP and mGFP are also shown. Fit curves (solid line) were obtained from two-component analysis. For comparison of mobility, the curves were normalized to the same amplitude,  $G(0) = 2$ .

#### Supplementary Figure S3. FCCS measurements for detecting interactions among prion proteins in live cells. (A) ~ (D) Representative FCCS measurement carried on non-prion and prion cells are respectively shown (upper and bottom). (Inset) Measured cell type ([*gpsi*<sup>-</sup>] or [*GPSI*<sup>+</sup>]) and a pair of proteins tagged with Tag-RFP and GFP. (Upper) Time trace of average fluorescence intensity (counts per second; cps in kHz) of two prion proteins (*red* and *blue*).

(Bottom) Two corresponding fluorescence auto-correlation functions (FAFs) of mCherry signal (*red*) and GFP signal (*blue*), and one fluorescence cross-correlation function (FCF) are shown. (E) Representative FCCS measurement carried on a [*psi*<sup>-</sup>] cell co-expressing Sis1-mCherry and Sup35NM-GFP are shown. (F) Representative FCCS measurement carried on a [*gpsi*<sup>-</sup>] cell co-expressing Hsp104-mCherry and Sup35NGMC are shown.

**Supplementary Figure S4. Histogram of RCA values for interaction between remodeling factor Sis1 and prion oligomers in yeast prion cells.** (A) Histogram of RCA values for interaction between Sis1-mCherry and Sup35NM-GFP oligomers. (B) Histogram for interaction between Sis1-mCherry and Rnq1-GFP oligomers.

## References

1. Kawai-Noma S, Ayano S, Pack CG et al. (2006) Dynamics of yeast prion aggregates in single living cells. *Genes Cells* 11, 1085-1096
2. Aron R, Higurashi T, Sahi C and Craig EA (2007) J-protein co-chaperone Sis1 required for generation of [RNQ<sup>+</sup>] seeds necessary for prion propagation. *EMBO J* 26, 3794-3803
3. Sikorski RS and Hieter P (1989) A system of shuttle vectors and yeast host strains designed for efficient manipulation of DNA in *Saccharomyces cerevisiae*. *Genetics* 122, 19-27
4. Tsuji T, Kawai-Noma S, Pack CG et al. (2011) Single-particle tracking of quantum dot-conjugated prion proteins inside yeast cells. *Biochem Biophys Res Commun* 405, 638-643
5. Higurashi T, Hines JK, Sahi C, Aron R and Craig EA (2008) Specificity of the J-protein Sis1 in the propagation of 3 yeast prions. *Proc Natl Acad Sci U S A* 105, 16596-16601
6. Pack CG, Yukii H, Toh-e A et al. (2014) Quantitative live-cell imaging reveals spatio-temporal dynamics and cytoplasmic assembly of the 26S proteasome. *Nat Commun* 5, 3396
7. Kryndushkin DS, Alexandrov IM, Ter-Avanesyan MD and Kushnirov VV (2003) Yeast [PSI<sup>+</sup>] prion aggregates are formed by small Sup35 polymers fragmented by Hsp104. *J Biol Chem* 278, 49636-49643
